# Supplementary material for: Single-Cell and Spatial Transcriptomics Unveil M-MDSC–Tumor Crosstalk Driving EMT in HCC via THBS1-SDC4 Axis
Source: Research Square preprint supplement (doi:10.21203/rs.3.rs-6912640/v1), 2025-06-27
Supplement: Supplementary file 1 [file 793cf45847e8b2bdb450ece8.xlsx]

## Sheet: 工作表 1 - Data S1
Data S1
	p_val	avg_log2FC	pct.1	pct.2	p_val_adj	cluster	gene
1	2.03641e-222	1.67689	0.987	0.5	5.15498e-218	Kupffer_M2_C1QC	C1QC
2	1.95478e-198	1.53391	0.992	0.544	4.94832e-194	Kupffer_M2_C1QC	C1QB
3	1.26128e-197	1.49999	0.996	0.568	3.19281e-193	Kupffer_M2_C1QC	C1QA
4	3.57737e-197	1.84369	0.852	0.271	9.05575e-193	Kupffer_M2_C1QC	HLA-DQA2
5	7.13032e-194	1.9572	0.785	0.216	1.80497e-189	Kupffer_M2_C1QC	FOLR2
6	1.70255e-170	1.51882	0.916	0.349	4.30984e-166	Kupffer_M2_C1QC	SEPP1
7	2.52527e-166	1.44782	0.963	0.49	6.39247e-162	Kupffer_M2_C1QC	HLA-DRB5
8	1.56343e-164	1.60465	0.695	0.173	3.95766e-160	Kupffer_M2_C1QC	A2M
9	9.82423e-163	1.6792	0.826	0.278	2.4869e-158	Kupffer_M2_C1QC	RNASE1
10	2.2308e-154	1.51265	0.803	0.283	5.64703e-150	Kupffer_M2_C1QC	MS4A4A
11	1.76777e-151	1.39377	0.864	0.33	4.47493e-147	Kupffer_M2_C1QC	PLD3
12	1.8202e-144	1.37066	0.766	0.242	4.60766e-140	Kupffer_M2_C1QC	DAB2
13	1.39204e-143	1.74883	0.592	0.141	3.52382e-139	Kupffer_M2_C1QC	LGALS3BP
14	1.67591e-135	1.67935	0.594	0.148	4.24239e-131	Kupffer_M2_C1QC	SERPING1
15	3.10302e-131	1.57038	0.608	0.165	7.855e-127	Kupffer_M2_C1QC	VSIG4
16	4.57195e-130	1.59328	0.631	0.176	1.15734e-125	Kupffer_M2_C1QC	TREM2
17	3.1947e-127	1.48366	0.603	0.161	8.08706e-123	Kupffer_M2_C1QC	CD59
18	1.29644e-114	1.44183	0.635	0.201	3.28181e-110	Kupffer_M2_C1QC	HSPA6
19	8.11141e-107	1.38472	0.545	0.155	2.05332e-102	Kupffer_M2_C1QC	AKR1B1
20	1.20072e-98	1.39483	0.464	0.114	3.03951e-94	Kupffer_M2_C1QC	SLCO2B1
21	4.00286e-97	1.42548	0.454	0.113	1.01328e-92	Kupffer_M2_C1QC	STMN1
22	4.69089e-92	1.37994	0.453	0.115	1.18745e-87	Kupffer_M2_C1QC	LPAR6
23	4.55349e-91	1.82024	0.332	0.06	1.15267e-86	Kupffer_M2_C1QC	LILRB5
24	3.38806e-90	1.45184	0.416	0.101	8.57654e-86	Kupffer_M2_C1QC	C2
25	1.66055e-87	1.35329	0.441	0.114	4.20351e-83	Kupffer_M2_C1QC	STAB1
26	1.08303e-86	1.49695	0.416	0.104	2.74159e-82	Kupffer_M2_C1QC	FUCA1
27	5.97804e-86	1.78285	0.324	0.061	1.51328e-81	Kupffer_M2_C1QC	EPHX1
28	4.96852e-74	1.63601	0.316	0.07	1.25773e-69	Kupffer_M2_C1QC	ALDH1A1
29	2.38655e-71	1.5364	0.284	0.056	6.04131e-67	Kupffer_M2_C1QC	IGF1
30	5.20648e-69	1.45357	0.309	0.07	1.31797e-64	Kupffer_M2_C1QC	SERPINH1
31	0	4.27165	0.858	0.182	0	TAM_SAM	SPP1
32	5.79728e-175	2.52538	0.91	0.612	1.46752e-170	TAM_SAM	CSTB
33	8.97976e-128	1.96629	0.866	0.548	2.27314e-123	TAM_SAM	S100A10
34	4.84248e-125	3.4466	0.56	0.163	1.22583e-120	TAM_SAM	NUPR1
35	5.27207e-114	1.40301	0.942	0.743	1.33457e-109	TAM_SAM	LGALS1
36	2.12506e-101	1.46454	0.905	0.759	5.37939e-97	TAM_SAM	GAPDH
37	3.28199e-94	1.35093	0.889	0.621	8.30804e-90	TAM_SAM	CTSD
38	2.89031e-74	1.41691	0.687	0.344	7.31654e-70	TAM_SAM	GPNMB
39	2.33905e-64	1.7927	0.611	0.355	5.92107e-60	TAM_SAM	LDHA
40	2.24825e-57	1.39531	0.669	0.393	5.69122e-53	TAM_SAM	FABP5
41	9.31027e-57	1.70121	0.663	0.397	2.3568e-52	TAM_SAM	PLIN2
42	2.76713e-51	2.79881	0.263	0.07	7.00472e-47	TAM_SAM	ERO1A
43	2.92135e-48	1.63986	0.547	0.294	7.39512e-44	TAM_SAM	LMNA
44	3.19364e-48	1.84341	0.515	0.257	8.08437e-44	TAM_SAM	CXCL3
45	4.47639e-47	1.7646	0.444	0.206	1.13315e-42	TAM_SAM	MIF
46	2.77994e-43	1.37951	0.583	0.376	7.03714e-39	TAM_SAM	PKM
47	1.61276e-38	2.46849	0.275	0.097	4.08254e-34	TAM_SAM	SCD
48	5.06891e-38	1.53768	0.374	0.163	1.28314e-33	TAM_SAM	ALOX5AP
49	6.68346e-35	2.09029	0.299	0.121	1.69185e-30	TAM_SAM	FCGR2B
50	7.54845e-34	1.55731	0.45	0.247	1.91081e-29	TAM_SAM	PLTP
51	4.04573e-31	1.80978	0.276	0.11	1.02414e-26	TAM_SAM	RGCC
52	1.52106e-30	1.99014	0.313	0.14	3.85041e-26	TAM_SAM	MMP19
53	8.12696e-29	1.86881	0.331	0.158	2.05726e-24	TAM_SAM	ABL2
54	1.84195e-27	2.15096	0.255	0.108	4.66272e-23	TAM_SAM	RALA
55	1.03996e-24	1.36857	0.285	0.128	2.63255e-20	TAM_SAM	CCL20
56	1.14584e-21	1.44687	0.371	0.214	2.90058e-17	TAM_SAM	IL1RN
57	5.35076e-19	1.49493	0.279	0.146	1.35449e-14	TAM_SAM	ATF5
58	3.65556e-17	1.53882	0.284	0.163	9.25368e-13	TAM_SAM	P4HA1
59	2.02056e-15	1.45706	0.253	0.136	5.11485e-11	TAM_SAM	CD36
60	4.01171e-09	1.31371	0.258	0.173	0.000101552	TAM_SAM	TFRC
61	1.91084e-57	5.14595	0.25	0.055	4.83711e-53	Kupffer_M2_DONSON	DONSON
62	2.65817e-41	3.74677	0.415	0.227	6.72888e-37	Kupffer_M2_DONSON	AC090498.1
63	1.01119e-22	0.700651	0.825	0.933	2.55973e-18	Kupffer_M2_DONSON	RPS29
64	3.79435e-18	0.596552	0.209	0.515	9.60501e-14	Kupffer_M2_DONSON	YBX1
65	2.0033e-17	0.629306	0.097	0.3	5.07116e-13	Kupffer_M2_DONSON	SCP2
66	5.8173e-17	0.707412	0.168	0.425	1.47259e-12	Kupffer_M2_DONSON	MSR1
67	6.49826e-17	0.637029	0.807	0.806	1.64497e-12	Kupffer_M2_DONSON	HLA-DPB1
68	6.67535e-16	0.674935	0.102	0.297	1.6898e-11	Kupffer_M2_DONSON	GLRX
69	1.53912e-15	0.617907	0.219	0.504	3.89613e-11	Kupffer_M2_DONSON	HMGN2
70	2.2848e-15	0.582409	0.095	0.279	5.78375e-11	Kupffer_M2_DONSON	CHMP5
71	2.54288e-15	0.591654	0.082	0.257	6.43706e-11	Kupffer_M2_DONSON	DNAJC8
72	4.65632e-15	0.66503	0.137	0.353	1.1787e-10	Kupffer_M2_DONSON	TMED2
73	4.8646e-15	0.766494	0.095	0.278	1.23143e-10	Kupffer_M2_DONSON	DNAJC15
74	5.64231e-15	0.739984	0.215	0.502	1.4283e-10	Kupffer_M2_DONSON	SH3BGRL
75	2.3094e-14	0.626218	0.209	0.482	5.84602e-10	Kupffer_M2_DONSON	RGS10
76	4.8829e-14	0.601016	0.164	0.391	1.23606e-09	Kupffer_M2_DONSON	VAMP5
77	5.26052e-14	0.668722	0.111	0.297	1.33165e-09	Kupffer_M2_DONSON	RASGEF1B
78	1.63916e-13	0.755185	0.098	0.271	4.14938e-09	Kupffer_M2_DONSON	SNRPE
79	1.80023e-13	0.72523	0.14	0.345	4.55709e-09	Kupffer_M2_DONSON	SRRM1
80	6.29119e-13	0.805558	0.093	0.257	1.59255e-08	Kupffer_M2_DONSON	MRPL51
81	1.75653e-12	0.673742	0.106	0.275	4.44648e-08	Kupffer_M2_DONSON	RWDD1
82	2.73784e-12	0.907301	0.153	0.356	6.93058e-08	Kupffer_M2_DONSON	NCL
83	7.2623e-12	0.746863	0.239	0.508	1.83838e-07	Kupffer_M2_DONSON	PSME1
84	1.52312e-08	2.16733	0.372	0.352	0.000385562	Kupffer_M2_DONSON	NBEAL1
85	3.86298e-08	0.64879	0.126	0.264	0.000977876	Kupffer_M2_DONSON	HNRNPH1
86	4.06703e-08	0.668696	0.282	0.547	0.00102953	Kupffer_M2_DONSON	EEF1B2
87	3.05138e-06	0.625869	0.284	0.508	0.0772425	Kupffer_M2_DONSON	LIPA
88	3.78091e-06	1.33459	0.182	0.341	0.09571	Kupffer_M2_DONSON	EPSTI1
89	2.79384e-05	0.581389	0.638	0.859	0.707233	Kupffer_M2_DONSON	RPL30
90	0.00366221	1.76106	0.348	0.396	1	Kupffer_M2_DONSON	RPL17
91	0	5.23231	0.806	0.108	0	M_MDSC_S100A8	S100A8
92	8.38099e-233	5.39706	0.403	0.012	2.12156e-228	M_MDSC_S100A8	S100A12
93	9.66733e-231	4.34455	0.836	0.33	2.44719e-226	M_MDSC_S100A8	S100A9
94	9.01089e-225	3.03557	0.734	0.167	2.28102e-220	M_MDSC_S100A8	FCN1
95	1.57882e-148	3.35512	0.496	0.093	3.99661e-144	M_MDSC_S100A8	VCAN
96	2.02559e-126	2.3192	0.841	0.564	5.12759e-122	M_MDSC_S100A8	TIMP1
97	1.83717e-114	4.00324	0.406	0.079	4.65061e-110	M_MDSC_S100A8	THBS1
98	1.76212e-103	1.96933	0.849	0.681	4.46063e-99	M_MDSC_S100A8	LYZ
99	2.04346e-63	2.21539	0.578	0.319	5.17282e-59	M_MDSC_S100A8	RP11-1143G9.4
100	1.23359e-52	3.02479	0.257	0.066	3.12271e-48	M_MDSC_S100A8	AQP9
101	1.3136e-50	1.89138	0.444	0.19	3.32525e-46	M_MDSC_S100A8	EREG
102	6.099e-49	2.53877	0.343	0.127	1.5439e-44	M_MDSC_S100A8	TREM1
103	8.95607e-47	2.20037	0.318	0.11	2.26714e-42	M_MDSC_S100A8	CFP
104	5.92329e-45	2.55597	0.335	0.131	1.49942e-40	M_MDSC_S100A8	CD55
105	1.18671e-41	2.72352	0.276	0.093	3.00403e-37	M_MDSC_S100A8	CRIP1
106	2.80366e-36	1.81158	0.528	0.373	7.09719e-32	M_MDSC_S100A8	SAMSN1
107	6.38773e-32	2.49847	0.26	0.1	1.61699e-27	M_MDSC_S100A8	CLEC4E
108	1.03971e-31	2.11245	0.376	0.206	2.63193e-27	M_MDSC_S100A8	FPR1
109	3.22901e-27	1.80944	0.398	0.237	8.17391e-23	M_MDSC_S100A8	CSTA
110	3.95085e-26	2.31027	0.252	0.109	1.00012e-21	M_MDSC_S100A8	FGR
111	2.95539e-25	2.08002	0.373	0.232	7.48128e-21	M_MDSC_S100A8	ATP2B1
112	1.47872e-23	2.31093	0.263	0.126	3.74324e-19	M_MDSC_S100A8	PPIF
113	2.91277e-23	1.81518	0.334	0.183	7.37339e-19	M_MDSC_S100A8	LINC01272
114	1.00305e-22	1.77549	0.309	0.163	2.53911e-18	M_MDSC_S100A8	SLC11A1
115	7.05065e-19	2.11407	0.26	0.137	1.7848e-14	M_MDSC_S100A8	DUSP6
116	7.95134e-18	1.83465	0.334	0.215	2.0128e-13	M_MDSC_S100A8	STXBP2
117	9.86312e-17	1.79551	0.304	0.188	2.49675e-12	M_MDSC_S100A8	ACSL1
118	2.65742e-14	1.83885	0.276	0.17	6.727e-10	M_MDSC_S100A8	STK17B
119	9.72768e-14	1.80866	0.329	0.225	2.46246e-09	M_MDSC_S100A8	CTNNB1
120	8.44346e-07	1.77689	0.257	0.199	0.0213738	M_MDSC_S100A8	GCA
121	8.7764e-64	0.967714	0.992	0.783	2.22166e-59	TAM_M2_HBEGF	HLA-DPB1
122	3.83854e-58	0.939613	0.99	0.819	9.71687e-54	TAM_M2_HBEGF	HLA-DRB1
123	1.71161e-57	1.72331	0.534	0.188	4.33278e-53	TAM_M2_HBEGF	HBEGF
124	1.42158e-55	0.91545	0.979	0.768	3.59858e-51	TAM_M2_HBEGF	HLA-DPA1
125	4.06474e-44	0.864969	0.969	0.763	1.02895e-39	TAM_M2_HBEGF	RPS2
126	4.57803e-44	0.799931	0.917	0.661	1.15888e-39	TAM_M2_HBEGF	RPS10
127	3.0368e-39	1.87011	0.339	0.106	7.68736e-35	TAM_M2_HBEGF	CLEC10A
128	1.08846e-37	1.00652	0.753	0.453	2.75532e-33	TAM_M2_HBEGF	CREM
129	2.22734e-31	1.44162	0.466	0.216	5.63829e-27	TAM_M2_HBEGF	SDS
130	3.05275e-30	0.986114	0.625	0.349	7.72772e-26	TAM_M2_HBEGF	PPP1CB
131	1.21887e-27	0.909248	0.654	0.394	3.08545e-23	TAM_M2_HBEGF	FGL2
132	1.74269e-27	0.968121	0.568	0.301	4.41143e-23	TAM_M2_HBEGF	PTPRE
133	2.11809e-27	0.855452	0.677	0.411	5.36174e-23	TAM_M2_HBEGF	CMTM6
134	1.66076e-26	0.942997	0.576	0.32	4.20404e-22	TAM_M2_HBEGF	HIF1A
135	4.13968e-26	0.989145	0.461	0.215	1.04792e-21	TAM_M2_HBEGF	NR4A3
136	2.3338e-24	0.889496	0.716	0.452	5.90779e-20	TAM_M2_HBEGF	GPR183
137	4.62452e-20	0.987179	0.401	0.196	1.17065e-15	TAM_M2_HBEGF	LGALS2
138	1.10414e-19	1.41671	0.284	0.123	2.79503e-15	TAM_M2_HBEGF	CD72
139	8.52598e-19	0.913711	0.411	0.217	2.15827e-14	TAM_M2_HBEGF	THEMIS2
140	1.10328e-16	0.859971	0.38	0.201	2.79284e-12	TAM_M2_HBEGF	PDE4B
141	2.70089e-16	1.41482	0.276	0.13	6.83704e-12	TAM_M2_HBEGF	AXL
142	1.05149e-15	0.820464	0.383	0.205	2.66175e-11	TAM_M2_HBEGF	STX11
143	7.3401e-15	1.17276	0.268	0.125	1.85807e-10	TAM_M2_HBEGF	RP5-1171I10.5
144	3.24633e-14	0.94214	0.307	0.158	8.21775e-10	TAM_M2_HBEGF	TCF4
145	7.977e-13	0.927618	0.305	0.164	2.0193e-08	TAM_M2_HBEGF	CSF2RA
146	1.61282e-12	0.802104	0.268	0.136	4.08268e-08	TAM_M2_HBEGF	PPA1
147	8.34075e-12	0.947385	0.253	0.125	2.11138e-07	TAM_M2_HBEGF	F13A1
148	9.97565e-12	0.850855	0.258	0.132	2.52524e-07	TAM_M2_HBEGF	CD300A
149	1.67074e-11	0.874553	0.312	0.174	4.22931e-07	TAM_M2_HBEGF	TFRC
150	2.5693e-11	1.54797	0.26	0.143	6.50392e-07	TAM_M2_HBEGF	SDC3
151	3.84836e-63	1.62764	0.891	0.49	9.74173e-59	M_MDSC_HSPD1	HSPE1
152	5.54801e-54	1.70252	0.778	0.388	1.40442e-49	M_MDSC_HSPD1	HSPD1
153	2.22525e-52	1.35836	0.973	0.759	5.63301e-48	M_MDSC_HSPD1	HSP90AA1
154	6.09829e-47	1.40201	0.796	0.422	1.54372e-42	M_MDSC_HSPD1	HSPH1
155	3.0257e-46	1.66849	0.568	0.229	7.65926e-42	M_MDSC_HSPD1	CACYBP
156	9.77156e-44	1.42261	0.408	0.12	2.47357e-39	M_MDSC_HSPD1	CFP
157	2.92544e-42	1.18358	0.932	0.639	7.40545e-38	M_MDSC_HSPD1	LST1
158	2.27036e-41	1.70085	0.586	0.261	5.74719e-37	M_MDSC_HSPD1	ZFAND2A
159	3.98879e-40	1.79191	0.45	0.162	1.00972e-35	M_MDSC_HSPD1	GBP1
160	5.07594e-40	1.7447	0.293	0.071	1.28492e-35	M_MDSC_HSPD1	PLAC8
161	1.11969e-39	1.59836	0.556	0.242	2.83438e-35	M_MDSC_HSPD1	DOK2
162	2.73491e-39	1.28983	0.793	0.459	6.92316e-35	M_MDSC_HSPD1	ISG15
163	9.93037e-38	1.19848	0.799	0.451	2.51377e-33	M_MDSC_HSPD1	DNAJA1
164	1.97985e-36	1.41873	0.559	0.248	5.01179e-32	M_MDSC_HSPD1	BAG3
165	1.54919e-34	1.43357	0.494	0.209	3.92162e-30	M_MDSC_HSPD1	STXBP2
166	1.7312e-34	1.39632	0.355	0.115	4.38235e-30	M_MDSC_HSPD1	WARS
167	1.93612e-34	1.63231	0.583	0.267	4.9011e-30	M_MDSC_HSPD1	HSPA6
168	2.93241e-31	1.2623	0.453	0.184	7.42311e-27	M_MDSC_HSPD1	LINC01272
169	8.93331e-30	1.53654	0.467	0.206	2.26138e-25	M_MDSC_HSPD1	MRPL18
170	7.25917e-29	1.80593	0.867	0.618	1.83759e-24	M_MDSC_HSPD1	MT2A
171	1.82815e-28	1.19713	0.82	0.501	4.62778e-24	M_MDSC_HSPD1	HSPB1
172	1.35723e-27	1.77945	0.302	0.104	3.43568e-23	M_MDSC_HSPD1	TNFSF10
173	1.89002e-26	1.26295	0.376	0.151	4.78439e-22	M_MDSC_HSPD1	LIMD2
174	1.25549e-21	1.23826	0.37	0.162	3.17815e-17	M_MDSC_HSPD1	PMAIP1
175	3.00108e-21	4.25709	0.251	0.094	7.59695e-17	M_MDSC_HSPD1	MT1G
176	2.38623e-19	1.44683	0.26	0.099	6.04049e-15	M_MDSC_HSPD1	FKBP4
177	3.76783e-19	1.25221	0.254	0.096	9.53787e-15	M_MDSC_HSPD1	FAM45A
178	5.06284e-17	2.31779	0.281	0.124	1.28161e-12	M_MDSC_HSPD1	MT1E
179	7.835e-13	1.22451	0.266	0.126	1.98335e-08	M_MDSC_HSPD1	FAM46A
180	1.55818e-12	3.06511	0.391	0.233	3.94438e-08	M_MDSC_HSPD1	MT1X
181	5.12127e-182	4.46128	0.41	0.014	1.2964e-177	TAM_M2_PLA2G2A	PLA2G2A
182	7.14476e-172	5.1167	0.374	0.012	1.80863e-167	TAM_M2_PLA2G2A	HPD
183	1.77006e-159	5.31437	0.313	0.007	4.48073e-155	TAM_M2_PLA2G2A	20
184	6.14958e-149	3.64692	0.672	0.08	1.5567e-144	TAM_M2_PLA2G2A	FABP1
185	5.46334e-105	2.90782	0.769	0.164	1.38299e-100	TAM_M2_PLA2G2A	APOA1
186	6.71977e-102	3.49588	0.862	0.238	1.70104e-97	TAM_M2_PLA2G2A	CCL4L2
187	2.17097e-98	3.19997	0.359	0.029	5.4956e-94	TAM_M2_PLA2G2A	SPINK1
188	1.77519e-94	2.83818	0.974	0.413	4.49372e-90	TAM_M2_PLA2G2A	ALB
189	3.72859e-85	2.41148	0.974	0.415	9.43854e-81	TAM_M2_PLA2G2A	APOA2
190	1.02389e-83	2.72412	0.472	0.066	2.59187e-79	TAM_M2_PLA2G2A	FGB
191	8.96488e-82	2.7522	0.569	0.105	2.26937e-77	TAM_M2_PLA2G2A	RBP4
192	4.32348e-77	3.34022	0.774	0.247	1.09445e-72	TAM_M2_PLA2G2A	CCL3L3
193	1.74719e-74	2.98891	0.395	0.052	4.42283e-70	TAM_M2_PLA2G2A	FGG
194	1.56099e-65	2.68074	0.538	0.115	3.95149e-61	TAM_M2_PLA2G2A	AMBP
195	3.95019e-65	3.63667	0.405	0.067	9.99951e-61	TAM_M2_PLA2G2A	VCAM1
196	7.40336e-61	1.91478	0.81	0.285	1.87409e-56	TAM_M2_PLA2G2A	SLC40A1
197	7.09309e-57	3.45326	0.333	0.05	1.79554e-52	TAM_M2_PLA2G2A	CD5L
198	6.75653e-51	1.78567	0.779	0.288	1.71035e-46	TAM_M2_PLA2G2A	APOC3
199	1.18067e-50	3.24032	0.262	0.033	2.98875e-46	TAM_M2_PLA2G2A	AGXT
200	6.15099e-49	2.77645	0.303	0.046	1.55706e-44	TAM_M2_PLA2G2A	FGA
201	2.6839e-46	2.34132	0.431	0.101	6.79402e-42	TAM_M2_PLA2G2A	VTN
202	2.57682e-41	2.58048	0.308	0.057	6.52297e-37	TAM_M2_PLA2G2A	AHSG
203	8.33408e-39	1.75322	0.518	0.165	2.10969e-34	TAM_M2_PLA2G2A	CPM
204	3.55714e-36	1.76661	0.549	0.19	9.00455e-32	TAM_M2_PLA2G2A	TTR
205	8.46323e-24	1.80059	0.308	0.088	2.14238e-19	TAM_M2_PLA2G2A	FILIP1L
206	6.10168e-23	1.74537	0.395	0.144	1.54458e-18	TAM_M2_PLA2G2A	MMP9
207	6.40819e-23	1.83314	0.41	0.159	1.62217e-18	TAM_M2_PLA2G2A	FUCA1
208	8.49992e-20	2.03057	0.323	0.111	2.15167e-15	TAM_M2_PLA2G2A	PDK4
209	2.72792e-17	1.77175	0.282	0.096	6.90546e-13	TAM_M2_PLA2G2A	IGF1
210	2.08999e-16	1.80442	0.297	0.109	5.2906e-12	TAM_M2_PLA2G2A	EPHX1
